# Supplementary material for: Lithographically Defined Three-dimensional Pore-patterned Carbon with Nitrogen Doping for High-Performance Ultrathin Supercapacitor Applications
Source: PubMed Central journal article supplement — Sci Rep. 2014 Jun 23;4:5392. doi: 10.1038/srep05392 (PMC4066249; doi:10.1038/srep05392), 2014-06-23
Supplement: srep05392-s1.pdf [file srep05392-s1.pdf]

## Supplementary Information

# Lithographically Defined Three-dimensional Pore-patterned Carbon with Nitrogen Doping for High-Performance Ultrathin Supercapacitor Applications

Da-Young Kang and Jun Hyuk Moon\*

Department of Chemical and Biomolecular Engineering, Sogang University, Seoul, Korea

Corresponding author, E-mail: [junhyuk@sogang.ac.kr](mailto:junhyuk@sogang.ac.kr)

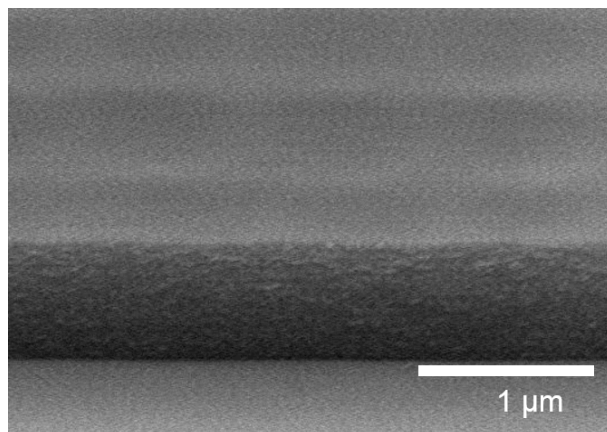

Figure S1. SEM image of SU8 pore patterns after pyrolytic carbonisation at 900°C in the absence of a silica support. The pore collapse of the film is clearly observed.

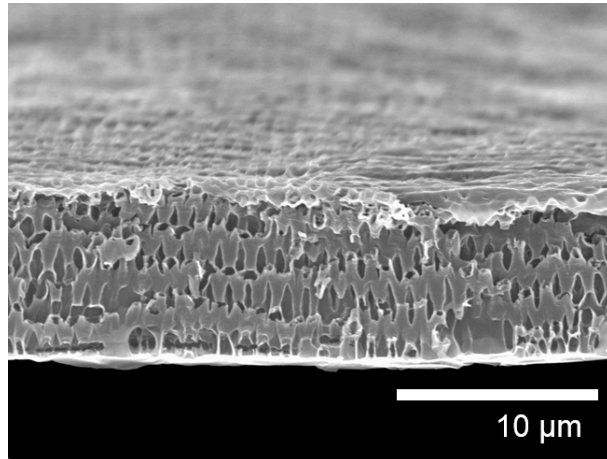

Figure S2. SEM image of the melamine-treated pore patterns without a silica shell.

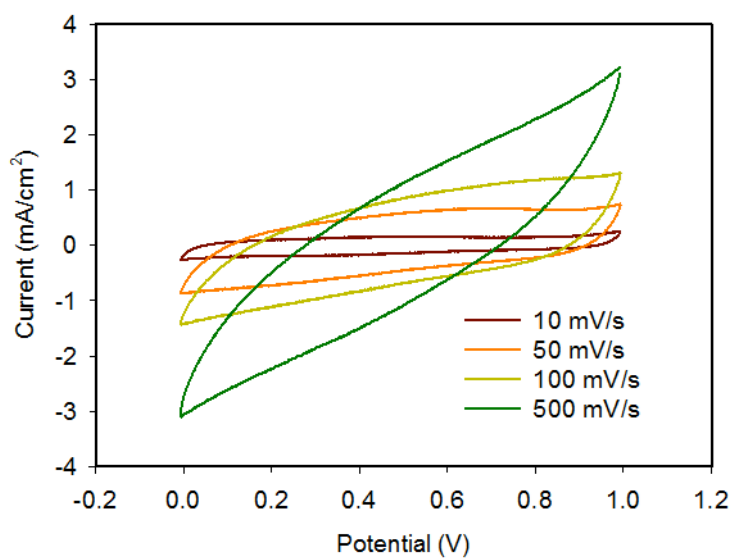

Figure S3. CV curves of the pristine pore-patterned carbon measured at various scan rates in 1 M H<sub>2</sub>SO<sub>4</sub>.

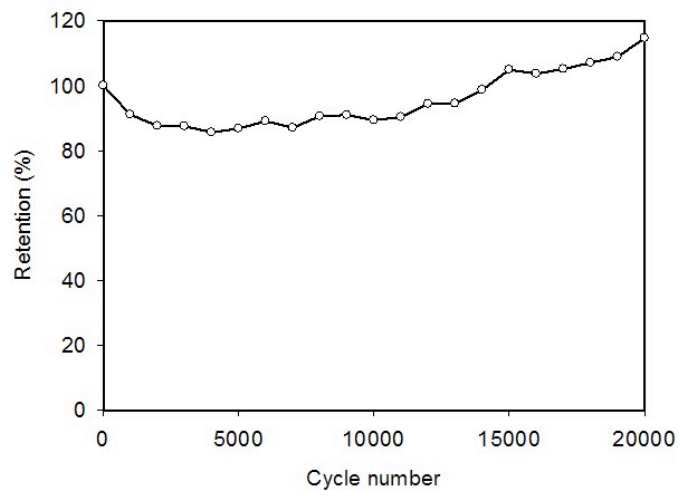

Figure S4. Cycle stability of high-N-doped pore-patterned carbon.

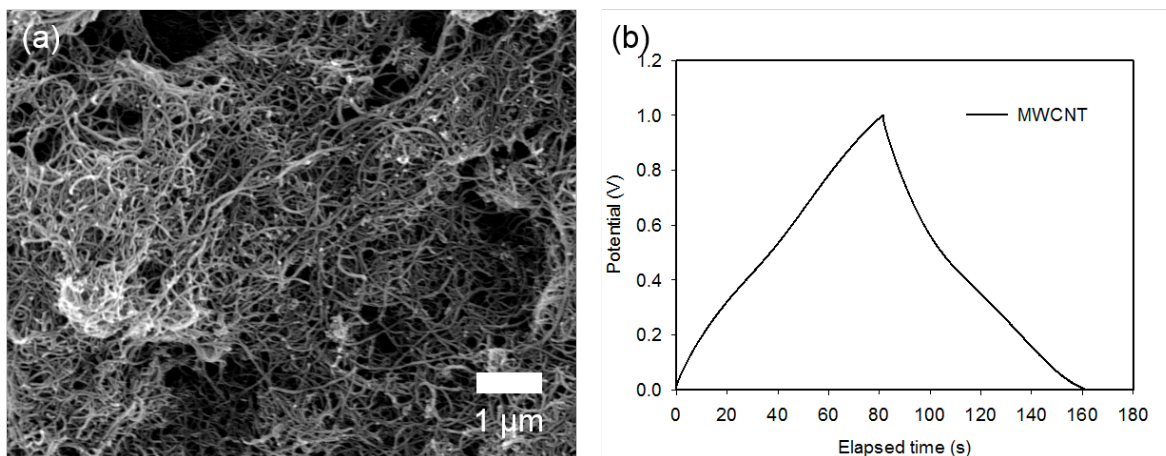

Figure S5. (a) SEM image of commercial MWCNT films (b) Galvanostatic charge/discharge of MWCNT film measured at 1 A/g in 1 M  $\text{H}_2\text{SO}_4$ .

Table S1. EDS results indicating the carbon, oxygen, and silicon chemical compositions for silica-coated pore-patterned carbons before and after the silica was etched.

| Chemical | Silica coated | Etched |
|----------|---------------|--------|
| C        | 73.20         | 92.05  |
| O        | 14.46         | 7.95   |
| Si       | 12.33         | 0      |

Table S2. The N/C ratio and the fraction of N-6, N-5, N-Q, and N-X configurations for the N-doped samples prepared at various doping temperatures.

|                 | bare | high-N | mid-N | low-N |
|-----------------|------|--------|-------|-------|
| N/C ratio       | 0    | 9.33   | 6.73  | 4.70  |
| Pyridinic N (%) | N/A  | 46.00  | 39.22 | 36.81 |
| Pyrrolic N (%)  | N/A  | 25.97  | 19.02 | 17.93 |
| Graphitic N (%) | N/A  | 18.97  | 31.01 | 34.43 |
| Oxidized N (%)  | N/A  | 9.06   | 10.75 | 10.83 |
